# Supplementary material for: An isoflavone derivative potently inhibits the angiogenesis and progression of triple-negative breast cancer by targeting the MTA2/SerRS/VEGFA pathway
Source: PubMed Central journal article supplement (PMC7476100; doi:10.20892/j.issn.2095-3941.2020.0010), 2020-08-15
Supplement: cbm-17-693-s001.pdf [file cbm-17-693-s001.pdf]

## Supplementary materials

**Table S1** Hemogram values of Balb/c mice with/without MEQ

| Parameters                 | Control       | MEQ (200 mg/kg) |
|----------------------------|---------------|-----------------|
| WBC                        | 5.94 ± 1.53   | 5.69 ± 0.68     |
| Neutrophil granulocyte %   | 3.95 ± 1.86   | 4.05 ± 2        |
| Lymphocyte %               | 95.43 ± 2.35  | 95.4 ± 2.17     |
| Monocyte %                 | 0.04 ± 0.06   | 0.04 ± 0.08     |
| Eosinophilic granulocyte % | 0.61 ± 0.51   | 0.5 ± 0.41      |
| Basophilic granulocyte %   | 0 ± 0         | 0.02 ± 0.03     |
| Neutrophil %               | 0.22 ± 0.04   | 0.24 ± 0.13     |
| LY                         | 5.69 ± 1.59   | 5.42 ± 0.56     |
| MO                         | 0 ± 0.01      | 0 ± 0.01        |
| EO                         | 0.03 ± 0.02   | 0.03 ± 0.03     |
| BA                         | 0 ± 0         | 0 ± 0           |
| RBC                        | 10.6 ± 0.36   | 10.53 ± 0.23    |
| Hemoglobin                 | 154.33 ± 2.08 | 146.67 ± 2.89   |
| Hematocrit                 | 35.27 ± 0.86  | 34.3 ± 0.46     |
| MCV                        | 33.4 ± 0.61   | 32.5 ± 0.8      |
| MCH                        | 14.57 ± 0.4   | 13.9 ± 0        |
| MCHC                       | 438 ± 6.08    | 428 ± 11        |
| RDW                        | 13.43 ± 0.25  | 13.87 ± 0.31    |
| PLT                        | 656.67 ± 51.6 | 641 ± 110.69    |
| PDW                        | 12.3 ± 0.46   | 12.17 ± 0.42    |
| MPV                        | 4.77 ± 0.25   | 4.47 ± 0.21     |
| Platelet                   | 0.31 ± 0.04   | 0.29 ± 0.04     |

Hemogram parameters of mice treated with MEQ or the dimethyl sulfoxide control. All values are presented as mean ± SD ( $n = 3$  in each group). WBC, white blood cell; LY, lymphocyte; MO, mononuclear cell; EO, eosinophils; BA, basophil granulocyte; RBC, red blood cell; MCV, mean corpuscular volume; MCH, mean corpuscular hemoglobin; MCHC, mean corpuscular hemoglobin concentration; RDW, red blood cell distribution width; PLT, blood platelet; PDW, platelet distribution width; MPV, mean platelet volume.

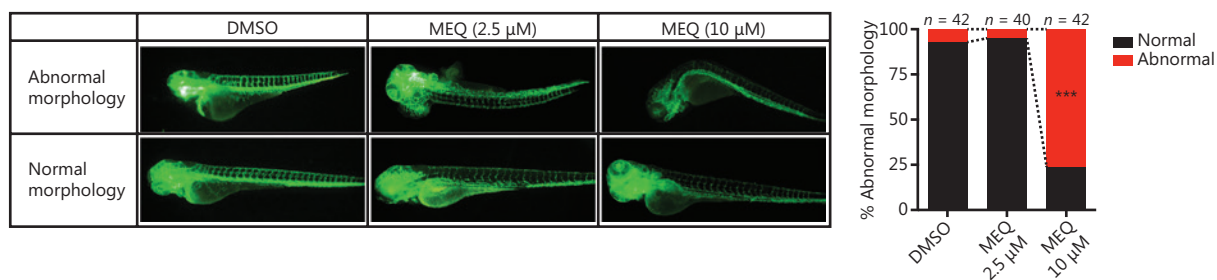

**Figure S1** The safe dosage range of MEQ was tested in zebrafish. The fertilized eggs of Tg (Fli1a: GFP) zebrafish at the 1–2 cell stage were injected with indicated dosages of MEQ and the morphology of the fish at 72 h post-fertilization was photographed. The percentages of fish with normal and abnormal morphologies were plotted as a bar graph ( $\chi^2$ -test, \*\*\* $P$  < 0.001). Scale bar: 0.2 mm.

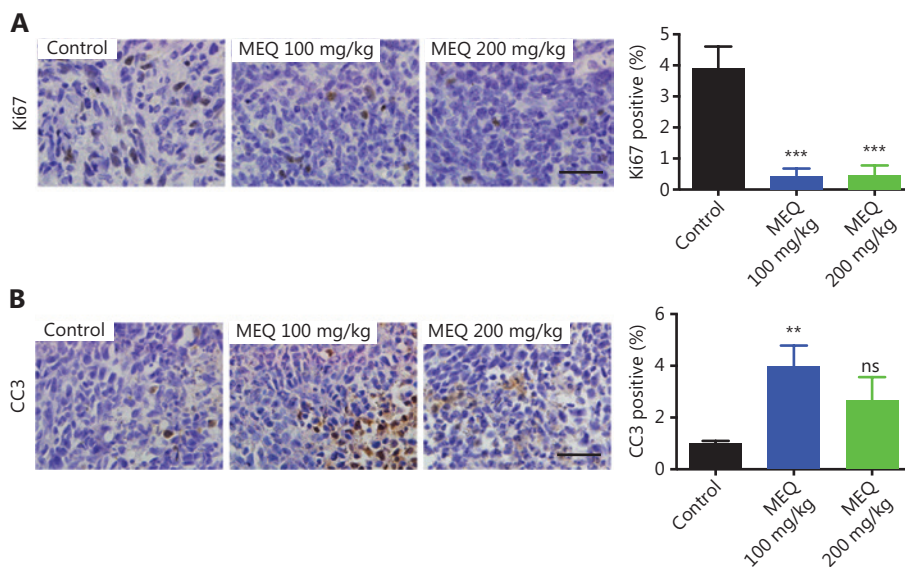

**Figure S2** Immunohistochemical staining for Ki67 (A) and CC3 (B) in 4T1 allografts dissected from mice and the quantification of positively stained cells. Data are plotted as the mean  $\pm$  SEM ( $n$  = 5; \*\* $P$  < 0.01; \*\*\* $P$  < 0.001 using Student's  $t$ -test). Scale bars: 100  $\mu$ m.

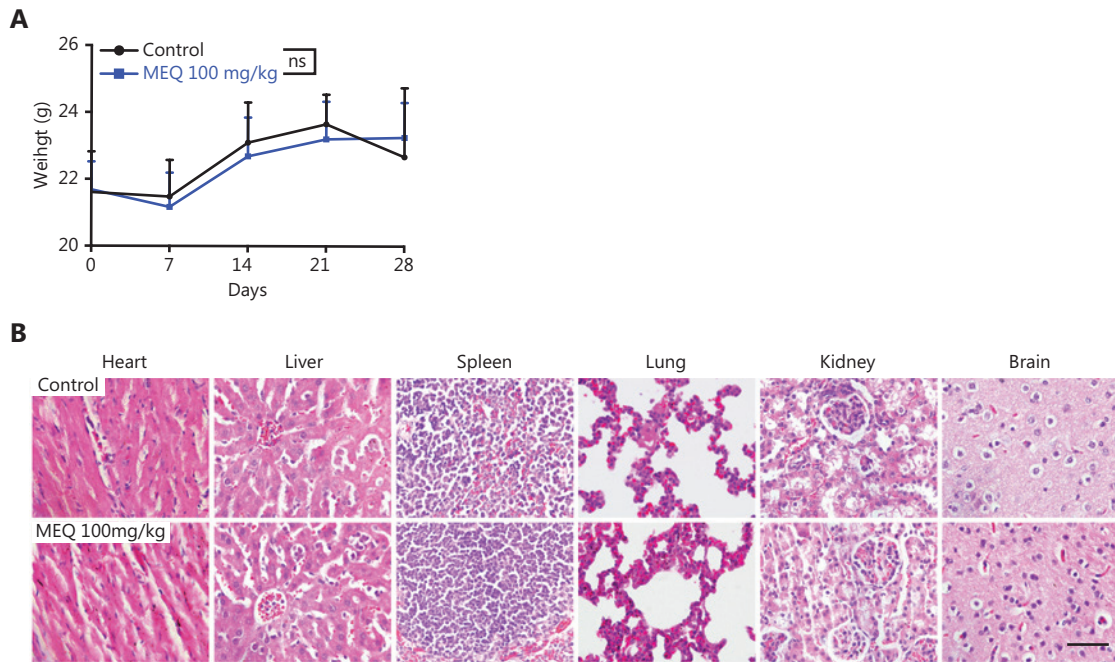

**Figure S3** The MEQ toxicity tests in mice. (A) Hematoxylin and eosin staining for the sections of hearts, livers, spleens, lungs, kidneys, and brains of mice treated with 100 mg/kg MEQ or the dimethyl sulfoxide (DMSO) control. Scale bar represents 100  $\mu$ m. (B) Weight changes of mice treated with DMSO or MEQ (100 mg/kg, intraperitoneal injections, once a day) for 4 weeks.

Scheme of the synthesis of Biotin-TEG-N3

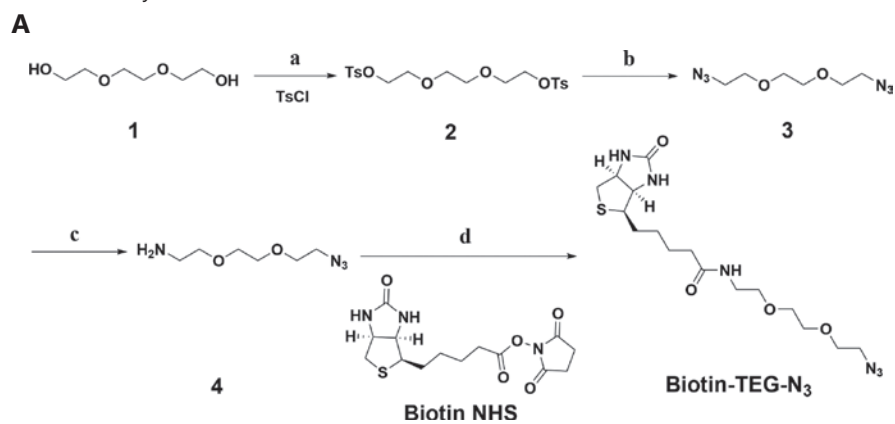

Scheme of the synthesis of MEQ-TEG-Biotin

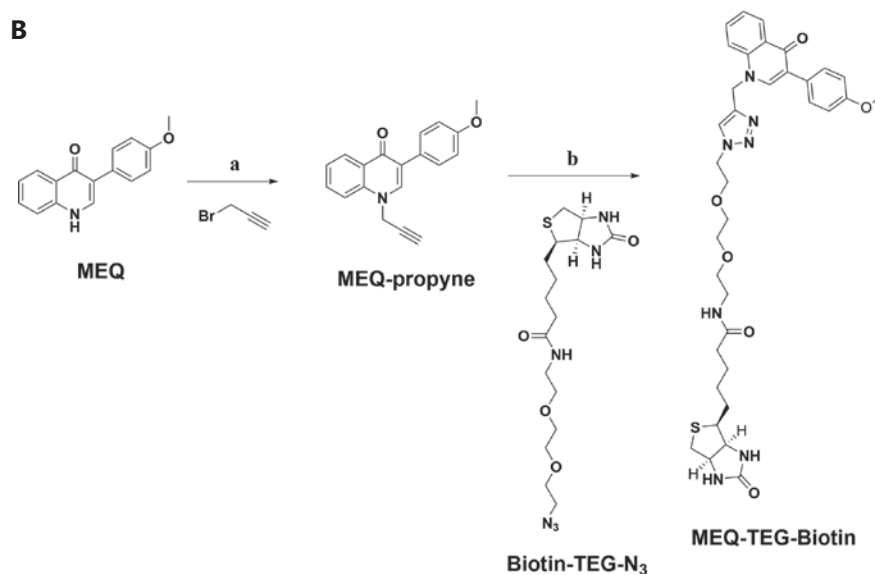

**Figure S4** Synthesis of MEQ-biotin. (A) Synthesis of biotin-TEG-N<sub>3</sub>. Reagents and conditions: (a) KOH, CHCl<sub>3</sub>, 0 °C, 1.5 h; (b) NaN<sub>3</sub>, DMF, 65 °C, 24 h; (c) PPh<sub>3</sub>, EtOAc/HCl/H<sub>2</sub>O, room temperature, 12 h; (d) DIEA, DMF/H<sub>2</sub>O, 35 °C, 12 h. (B) Synthesis of MEQ-TEG<sub>3</sub>-biotin. Reagents and conditions: (a) K<sub>2</sub>CO<sub>3</sub>, DMF, 0 °C, 8 h; (b) Et<sub>3</sub>N, CuSO<sub>4</sub>, Buffer, 35 °C, 5 h.

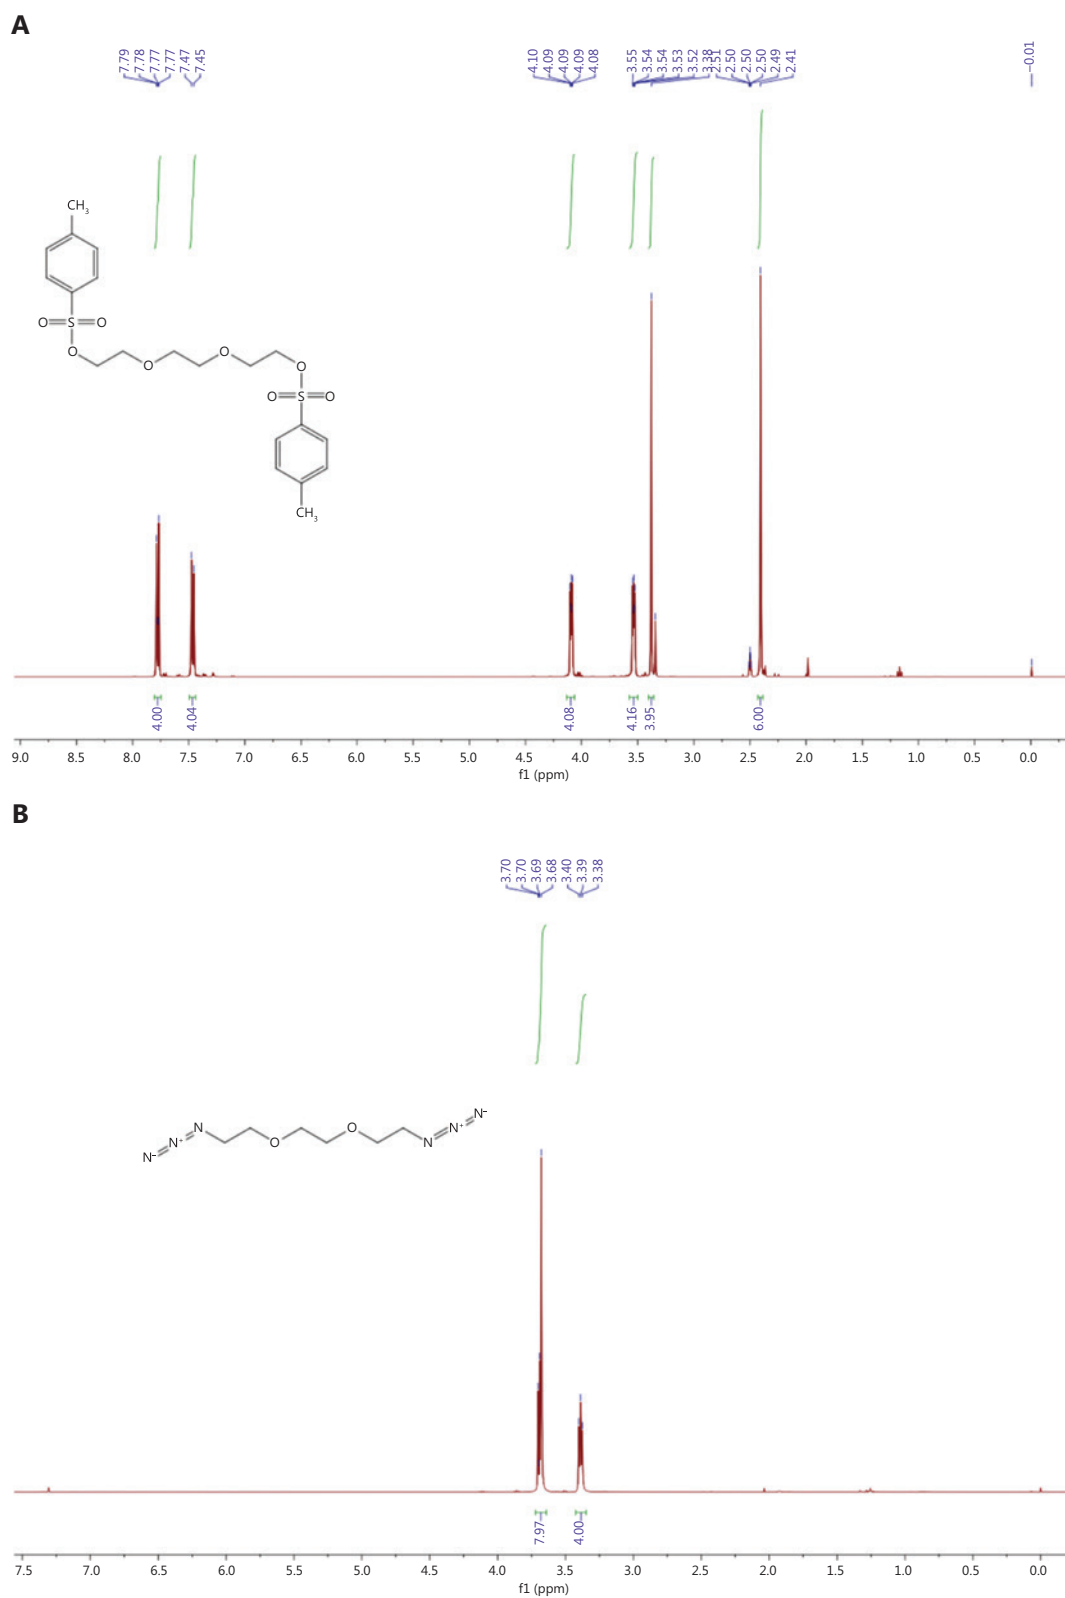

Figure S5 (continued)

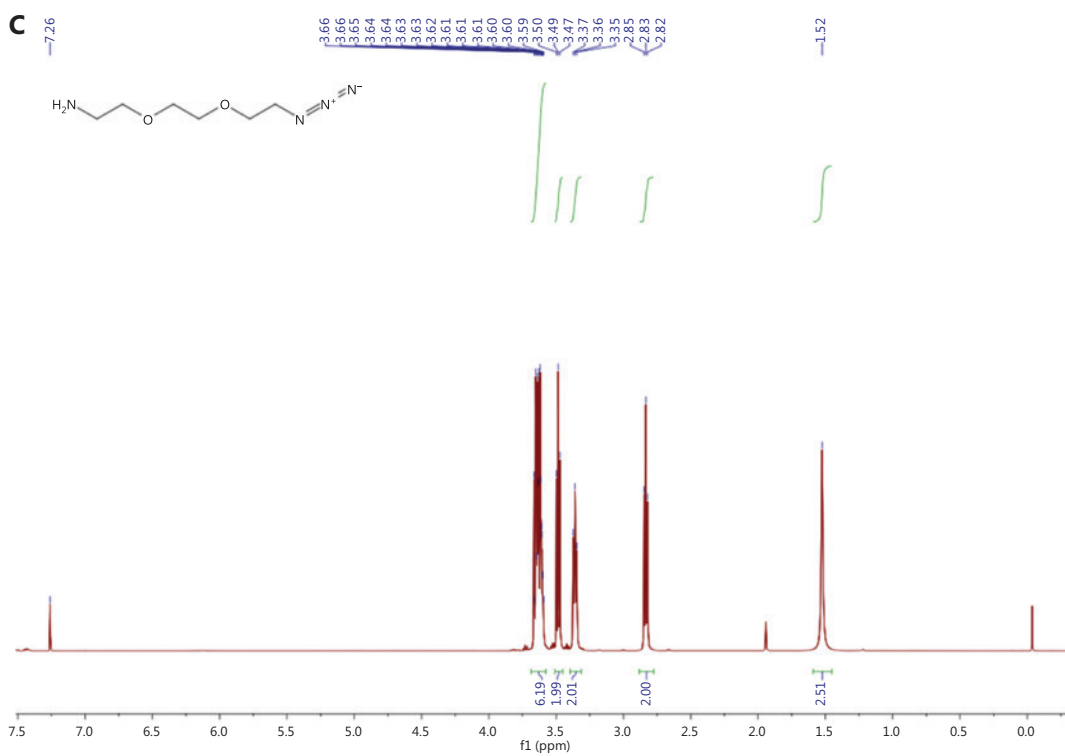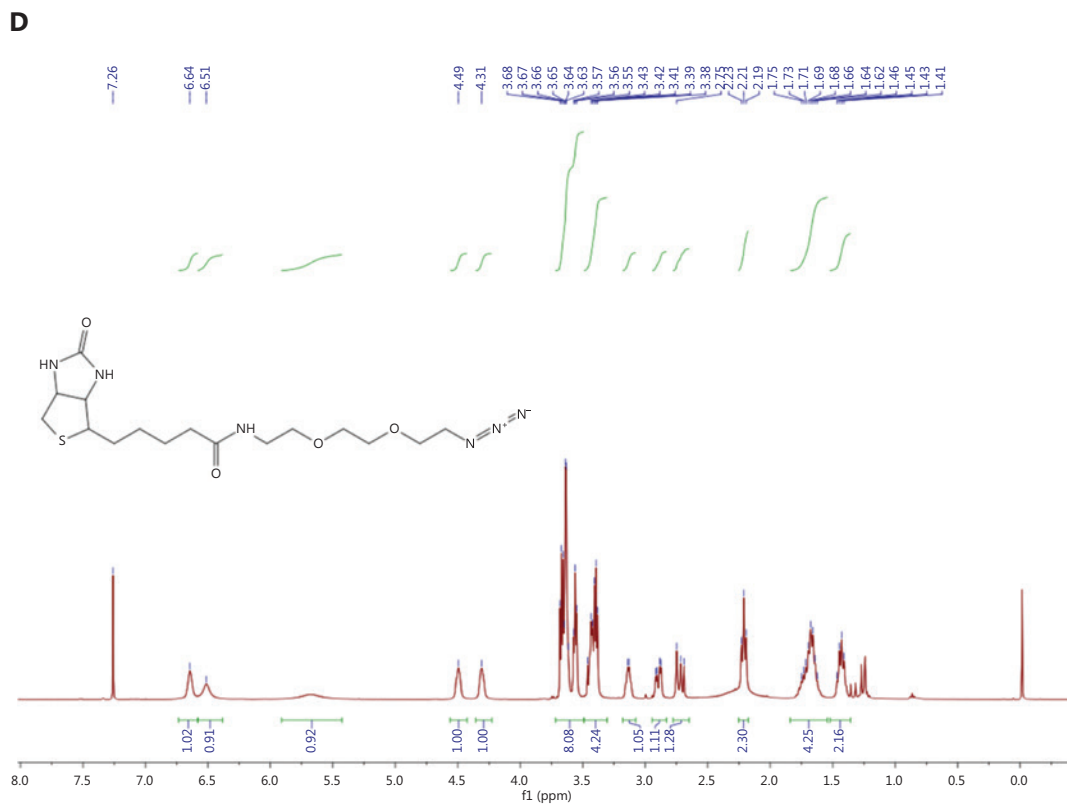

---

**Figure S5** (A) <sup>1</sup>H NMR of TEG-diOTs. <sup>1</sup>H NMR (400 MHz, DMSO-d<sub>6</sub>) δ 7.81–7.75 (m, 4H), 7.46 (d, *J* = 8.0 Hz, 4H), 4.13–4.06 (m, 4H), 3.58–3.50 (m, 4H), 3.38 (s, 4H), 2.41 (s, 6H). Exact mass calculated for C<sub>20</sub>H<sub>26</sub>O<sub>8</sub>S<sub>2</sub> [M+H]<sup>+</sup>: 459.1147; found 459.1150. (B) <sup>1</sup>H NMR of TEG-diN<sub>3</sub>. <sup>1</sup>H NMR (400 MHz, CDCl<sub>3</sub>) δ 3.72–3.64 (m, 8H), 3.42–3.35 (m, 4H). Exact mass calculated for C<sub>6</sub>H<sub>12</sub>N<sub>6</sub>O<sub>2</sub> [M+H]<sup>+</sup>: 201.1100; found 201.1102. (C) <sup>1</sup>H NMR of N<sub>3</sub>-TEG-NH<sub>2</sub>. <sup>1</sup>H NMR (400 MHz, CDCl<sub>3</sub>) δ 3.69–3.57 (m, 6H), 3.49 (t, *J* = 5.2 Hz, 2H), 3.40–3.31 (m, 2H), 2.83 (t, *J* = 5.2 Hz, 2H), 1.52 (s, 2H). Exact mass calculated for C<sub>6</sub>H<sub>14</sub>N<sub>4</sub>O<sub>2</sub> [M+H]<sup>+</sup>: 175.1195; found 175.1193. (D) <sup>1</sup>H NMR of Biotin-TEG-N<sub>3</sub>. <sup>1</sup>H NMR (400 MHz, CDCl<sub>3</sub>) δ 6.64 (s, 1H), 6.51 (s, 1H), 5.91–5.43 (m, 1H), 4.49 (s, 1H), 4.31 (s, 1H), 3.72–3.49 (m, 8H), 3.42 (dt, *J* = 9.9, 7.9 Hz, 4H), 3.13 (d, *J* = 4.3 Hz, 1H), 2.89 (dd, *J* = 12.8, 4.5 Hz, 1H), 2.78–2.65 (m, 1H), 2.21 (t, *J* = 7.3 Hz, 2H), 1.69 (ddt, *J* = 21.0, 13.7, 7.0 Hz, 4H), 1.44 (dd, *J* = 14.6, 7.3 Hz, 2H). Exact mass calculated for C<sub>16</sub>H<sub>28</sub>N<sub>6</sub>O<sub>4</sub>S [M+H]<sup>+</sup>: 401.1971; found 401.1970.

A

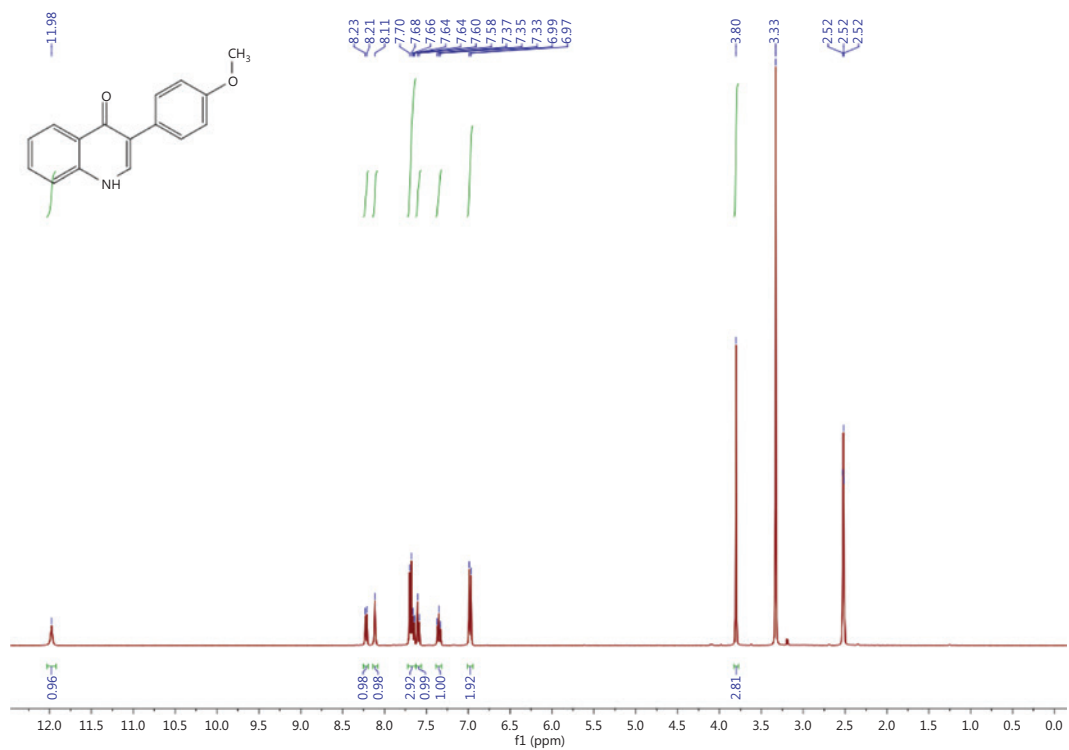

B

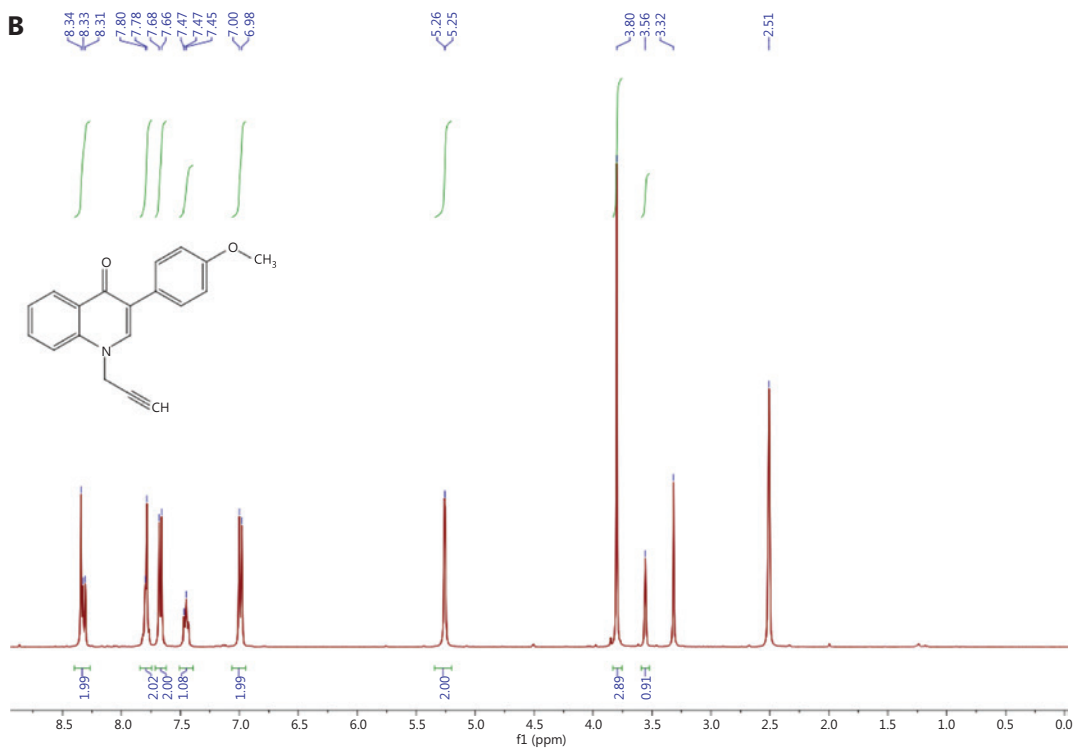

Figure S6 (continued)



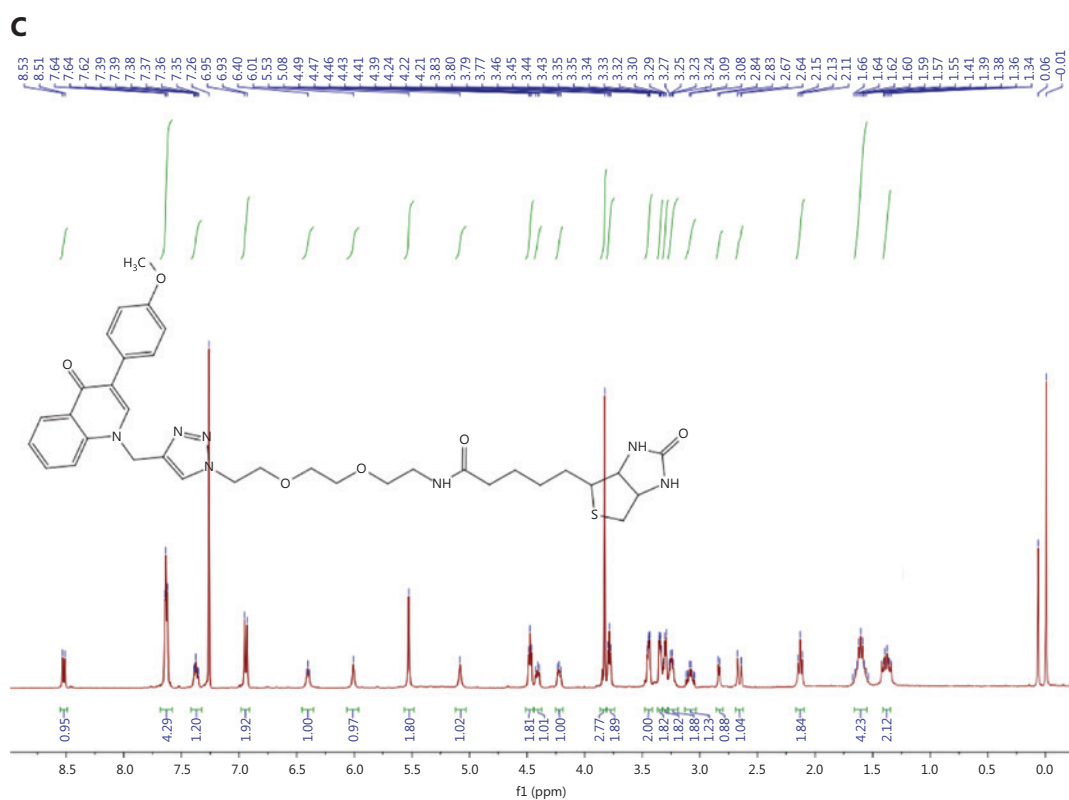

**Figure S6** (A) <sup>1</sup>H NMR of MEQ. <sup>1</sup>H NMR (400 MHz, DMSO-*d*<sub>6</sub>) δ 11.98 (s, 1H), 8.22 (d, *J* = 8.1 Hz, 1H), 8.11 (s, 1H), 7.72–7.63 (m, 3H), 7.59 (d, *J* = 8.2 Hz, 1H), 7.35 (t, *J* = 7.4 Hz, 1H), 6.98 (d, *J* = 8.7 Hz, 2H), 3.80 (s, 3H). Exact mass calculated for C<sub>16</sub>H<sub>13</sub>NO<sub>2</sub> [M+H]<sup>+</sup>: 252.1025; found 252.1026. (B) <sup>1</sup>H NMR of MEQ-propyne. <sup>1</sup>H NMR (400 MHz, DMSO-*d*<sub>6</sub>) δ 8.40–8.26 (m, 2H), 7.79 (d, *J* = 5.1 Hz, 2H), 7.67 (d, *J* = 8.6 Hz, 2H), 7.51–7.39 (m, 1H), 6.99 (d, *J* = 8.6 Hz, 2H), 5.26 (d, *J* = 1.9 Hz, 2H), 3.80 (s, 3H), 3.56 (s, 1H). Exact mass calculated for C<sub>19</sub>H<sub>15</sub>NO<sub>2</sub> [M+H]<sup>+</sup>: 290.1181; found 290.1180. (C) <sup>1</sup>H NMR of MEQ-TEG-Biotin. <sup>1</sup>H NMR (400 MHz, CDCl<sub>3</sub>) δ 8.52 (d, *J* = 7.9 Hz, 1H), 7.68–7.58 (m, 4H), 7.42–7.33 (m, 1H), 6.94 (d, *J* = 8.7 Hz, 2H), 6.40 (t, *J* = 5.2 Hz, 1H), 6.01 (s, 1H), 5.53 (s, 2H), 5.08 (s, 1H), 4.47 (t, *J* = 4.9 Hz, 2H), 4.44–4.37 (m, 1H), 4.25–4.19 (m, 1H), 3.83 (s, 3H), 3.78 (t, *J* = 4.9 Hz, 2H), 3.44 (dd, *J* = 5.4, 3.2 Hz, 2H), 3.34 (dd, *J* = 5.4, 3.1 Hz, 2H), 3.32–3.28 (m, 2H), 3.25 (dd, *J* = 9.3, 4.5 Hz, 2H), 3.13–3.03 (m, 1H), 2.83 (d, *J* = 4.8 Hz, 1H), 2.66 (d, *J* = 12.7 Hz, 1H), 2.13 (t, *J* = 7.3 Hz, 2H), 1.66–1.55 (m, 4H), 1.38 (dd, *J* = 13.7, 6.3 Hz, 2H). Exact mass calculated for C<sub>35</sub>H<sub>47</sub>N<sub>7</sub>O<sub>6</sub>S [M+Na]<sup>+</sup>: 712.2893; found 712.2904.
